# Supplementary material
Source: HighWire-hosted journal article supplement (http://dmd.aspetjournals.org/highwire/filestream/66445/field_highwire_adjunct_files/0/Abduljalil_2014_DMD_SUPPLEMENTARY_EDITED.pdf)
Supplement: Abduljalil_2014_DMD_SUPPLEMENTARY_EDITED.pdf [file Abduljalil_2014_DMD_SUPPLEMENTARY_EDITED.pdf]

DMD # 58099

**Drug Metabolism and Disposition**

**Deciding on Success Criteria for Predictability of Pharmacokinetic Parameters from In Vitro Studies: An Analysis  
Based on In Vivo Observations**

Khaled Abduljalil, Theresa Cain, Helen Humphries, Amin Rostami-Hodjegan

Simcyp Limited (a Certara company), Sheffield, S2 4SU, UK

School of Pharmacy and Pharmaceutical Sciences, University of Manchester, Manchester, UK

**Supplemental Table A. Collected clinical data for CL and V<sub>ss</sub> after intravenous administration for 17 different compounds**

| Compound      | Systemic Clearance (CL <sub>iv</sub> ) |                       |                  |                                        | Volume of distribution (V <sub>ss</sub> ) |                       |                  |                                                               |
|---------------|----------------------------------------|-----------------------|------------------|----------------------------------------|-------------------------------------------|-----------------------|------------------|---------------------------------------------------------------|
|               | No. of Trials                          | Total no. of Subjects | Mean %CV (range) | References                             | No. of Trials                             | Total no. of Subjects | Mean %CV (range) | References                                                    |
| Talinolol     | 7                                      | 72                    | 16 (11 – 26)     | [1-7]                                  | NA                                        | NA                    | NA               | NA                                                            |
| Propranolol   | 12                                     | 102                   | 17 (3 – 41)      | [8-15]                                 | NA                                        | NA                    | NA               | NA                                                            |
| Cisatracurium | 12                                     | 210                   | 18 (3 – 32)      | [16-25]                                | NA                                        | NA                    | NA               | NA                                                            |
| Acetaminophen | 11                                     | 146                   | 19 (7 – 31)      | [26-35]                                | 12                                        | 146                   | 19 (11 – 27)     | [26-35]                                                       |
| Lidocaine     | 11                                     | 104                   | 20 (6 – 32)      | [36-45]                                | 9                                         | 90                    | 21 (9 – 28)      | [36-40, 43-46]                                                |
| Propofol      | 15                                     | 305                   | 21 (5 – 60)      | [47-58]                                | NA                                        | NA                    | NA               | NA                                                            |
| Metronidazole | 17                                     | 182                   | 21 (6 – 43)      | [59-70]                                | 12                                        | 184                   | 24 (7 – 50)      | [59, 61-71]                                                   |
| Theophylline  | 21                                     | 230                   | 22 (6 – 83)      | [72-91]                                | NA                                        | NA                    | NA               | NA                                                            |
| Ciprofloxacin | 18                                     | 265                   | 23 (10 – 60)     | [92-109]                               | 15                                        | 190                   | 21 (13 – 39)     | [92, 94-97, 99, 100, 102, 104, 107-109]                       |
| Midazolam     | 33                                     | 570                   | 23 (6 – 46)      | [110-142]                              | 21                                        | 251                   | 17 (2 – 40)      | [110, 112, 116-120, 122, 124-126, 129, 132-138, 140]          |
| Antipyrine    | 10                                     | 257                   | 23 (6 – 48)      | [27, 30, 32, 34, 143-147]              | 10                                        | 297                   | 14 (4 – 33)      | [27, 30, 32, 34, 143, 145-148]                                |
| Digoxin       | 18                                     | 202                   | 25 (13-47)       | [149-165]                              | 8                                         | 110                   | 32 (11 – 64)     | [149, 150, 153-157, 159]                                      |
| Furosemide    | 15                                     | 99                    | 25 (7 – 50)      | [166-180]                              | 11                                        | 72                    | 22 (6 – 58)      | [166, 167, 169, 172, 174, 179, 181-185]                       |
| Thiopental    | 18                                     | 180                   | 29 (11 – 56)     | [186-202]                              | 12                                        | 117                   | 37 (14 – 73)     | [186-191, 195-198, 200, 201]                                  |
| Lorazepam     | 21                                     | 196                   | 30 (10-49)       | [26, 27, 89, 131, 143, 144, 203-214]   | 15                                        | 136                   | 18 (8 – 34)      | [26, 27, 30, 131, 143, 205, 206, 208, 209, 211, 212, 215-218] |
| Diazepam      | 21                                     | 301                   | 31 (11 – 51)     | [27, 127, 131, 143, 206, 211, 219-232] | 14                                        | 152                   | 32 (11 – 57)     | [26, 27, 143, 206, 211, 219, 221, 223-226, 229, 230]          |
| Alfentanil    | 14                                     | 193                   | 40 (7 – 68)      | [122, 123, 233-243]                    | NA                                        | NA                    | NA               | NA                                                            |

NA= not applicable (data was not available).

**Supplemental Table B. Percentage of 100,000 simulated trial means outside two-fold limits stratified by sample size and CV% ( $\sigma$ )**

| CV(%) | Trial size |        |        |        |        |        |        |        |        |        |        |        |        |        |        |       |
|-------|------------|--------|--------|--------|--------|--------|--------|--------|--------|--------|--------|--------|--------|--------|--------|-------|
|       | 5          | 6      | 7      | 8      | 9      | 10     | 11     | 12     | 13     | 14     | 15     | 16     | 17     | 18     | 19     | 20    |
| 10    | 0          | 0      | 0      | 0      | 0      | 0      | 0      | 0      | 0      | 0      | 0      | 0      | 0      | 0      | 0      | 0     |
| 20    | 0          | 0      | 0      | 0      | 0      | 0      | 0      | 0      | 0      | 0      | 0      | 0      | 0      | 0      | 0      | 0     |
| 30    | 0.21       | 0.062  | 0.022  | 0.012  | 0.003  | 0.002  | 0      | 0      | 0      | 0      | 0      | 0      | 0      | 0      | 0      | 0     |
| 40    | 1.868      | 0.959  | 0.543  | 0.306  | 0.169  | 0.091  | 0.037  | 0.025  | 0.009  | 0.006  | 0.006  | 0.001  | 0.001  | 0      | 0.001  | 0     |
| 50    | 5.543      | 3.533  | 2.384  | 1.526  | 1.016  | 0.659  | 0.449  | 0.32   | 0.223  | 0.121  | 0.121  | 0.071  | 0.035  | 0.029  | 0.024  | 0.019 |
| 60    | 10.052     | 7.225  | 5.314  | 3.908  | 2.837  | 2.099  | 1.487  | 1.152  | 0.846  | 0.607  | 0.607  | 0.35   | 0.269  | 0.174  | 0.155  | 0.113 |
| 70    | 14.951     | 11.67  | 8.992  | 6.913  | 5.452  | 4.158  | 3.377  | 2.533  | 1.981  | 1.613  | 1.613  | 1.008  | 0.818  | 0.674  | 0.514  | 0.39  |
| 80    | 19.765     | 15.95  | 12.944 | 10.434 | 8.335  | 6.776  | 5.605  | 4.585  | 3.765  | 3.125  | 3.125  | 2.119  | 1.673  | 1.449  | 1.214  | 1.013 |
| 90    | 23.899     | 19.901 | 16.379 | 13.746 | 11.307 | 9.496  | 7.988  | 6.763  | 5.699  | 4.969  | 4.969  | 3.497  | 2.964  | 2.553  | 2.139  | 1.91  |
| 100   | 27.584     | 23.295 | 19.942 | 16.942 | 14.155 | 12.313 | 10.716 | 9.184  | 7.914  | 6.911  | 6.911  | 5.052  | 4.388  | 3.952  | 3.397  | 2.916 |
| 110   | 30.886     | 26.765 | 23.081 | 19.721 | 17.068 | 15.013 | 13.151 | 11.738 | 10.073 | 8.648  | 8.648  | 6.798  | 5.99   | 5.27   | 4.764  | 4.269 |
| 120   | 33.591     | 29.329 | 25.629 | 22.494 | 19.925 | 17.397 | 15.465 | 13.752 | 11.929 | 10.68  | 10.68  | 8.538  | 7.534  | 6.93   | 6.174  | 5.578 |
| 130   | 36.366     | 31.462 | 27.925 | 24.866 | 22.076 | 19.685 | 17.685 | 15.575 | 14.163 | 12.52  | 12.52  | 10.283 | 9.247  | 8.335  | 7.514  | 6.706 |
| 140   | 38.383     | 34.028 | 30.229 | 27.011 | 24.107 | 22.027 | 19.793 | 17.736 | 16.257 | 14.412 | 14.412 | 12.08  | 10.942 | 9.99   | 8.988  | 8.082 |
| 150   | 40.764     | 35.95  | 32.311 | 29.115 | 26.095 | 23.704 | 21.477 | 19.715 | 17.713 | 16.203 | 16.203 | 13.623 | 12.28  | 11.208 | 10.322 | 9.44  |

**References:**

1. Bernsdorf, A., et al., *Simvastatin does not influence the intestinal P-glycoprotein and MPR2, and the disposition of talinolol after chronic medication in healthy subjects genotyped for the ABCB1, ABCC2 and SLCO1B1 polymorphisms*. Br J Clin Pharmacol, 2006. **61**(4): p. 440-50.
2. Giessmann, T., et al., *Carbamazepine regulates intestinal P-glycoprotein and multidrug resistance protein MRP2 and influences disposition of talinolol in humans*. Clin Pharmacol Ther, 2004. **76**(3): p. 192-200.
3. Schwarz, U.I., et al., *Induction of intestinal P-glycoprotein by St John's wort reduces the oral bioavailability of talinolol*. Clin Pharmacol Ther, 2007. **81**(5): p. 669-78.
4. Siegmund, W., et al., *The effects of the human MDR1 genotype on the expression of duodenal P-glycoprotein and disposition of the probe drug talinolol*. Clin Pharmacol Ther, 2002. **72**(5): p. 572-83.
5. Trausch, B., et al., *Disposition and bioavailability of the beta 1-adrenoceptor antagonist talinolol in man*. Biopharm Drug Dispos, 1995. **16**(5): p. 403-14.
6. Westphal, K., et al., *Oral bioavailability of digoxin is enhanced by talinolol: evidence for involvement of intestinal P-glycoprotein*. Clin Pharmacol Ther, 2000. **68**(1): p. 6-12.
7. Westphal, K., et al., *Induction of P-glycoprotein by rifampin increases intestinal secretion of talinolol in human beings: a new type of drug/drug interaction*. Clin Pharmacol Ther, 2000. **68**(4): p. 345-55.
8. Bowman, S.L., et al., *A comparison of the pharmacokinetics of propranolol in obese and normal volunteers*. Br J Clin Pharmacol, 1986. **21**(5): p. 529-32.
9. Branch, R.A., J. James, and A.E. Read, *A study of factors influencing drug disposition in chronic liver disease, using the model drug (+)-propranolol*. Br J Clin Pharmacol, 1976. **3**(2): p. 243-9.
10. Castleden, C.M. and C.F. George, *The effect of ageing on the hepatic clearance of propranolol*. Br J Clin Pharmacol, 1979. **7**(1): p. 49-54.
11. Cheymol, G., et al., *Comparative pharmacokinetics of intravenous propranolol in obese and normal volunteers*. J Clin Pharmacol, 1987. **27**(11): p. 874-9.
12. Cheymol, G., et al., *Pharmacokinetics of beta-adrenoceptor blockers in obese and normal volunteers*. Br J Clin Pharmacol, 1997. **43**(6): p. 563-70.
13. Cid, E., et al., *Plasma concentrations and bioavailability of propranolol by oral, rectal, and intravenous administration in man*. Biopharm Drug Dispos, 1986. **7**(6): p. 559-66.
14. Fagan, T.C., et al., *Early kinetics of intravenous propranolol*. Br J Clin Pharmacol, 1982. **13**(4): p. 571-4.
15. Regardh, C.G., et al., *Plasma concentrations and beta-blocking effects in normal volunteers after intravenous doses of metoprolol and propranolol*. J Cardiovasc Pharmacol, 1980. **2**(6): p. 715-23.
16. Bergeron, L., et al., *Concentration-effect relationship of cisatracurium at three different dose levels in the anesthetized patient*. Anesthesiology, 2001. **95**(2): p. 314-23.
17. De Wolf, A.M., et al., *Pharmacokinetics and pharmacodynamics of cisatracurium in patients with end-stage liver disease undergoing liver transplantation*. Br J Anaesth, 1996. **76**(5): p. 624-8.

18. Eastwood, N.B., et al., *Pharmacokinetics of 1R-cis 1'R-cis atracurium besylate (51W89) and plasma laudanosine concentrations in health and chronic renal failure*. Br J Anaesth, 1995. **75**(4): p. 431-5.
19. Lepage, J.Y., et al., *Pharmacodynamic dose-response and safety study of cisatracurium (51W89) in adult surgical patients during N2O-O2-opioid anesthesia*. Anesth Analg, 1996. **83**(4): p. 823-9.
20. Lien, C.A., et al., *Pharmacokinetics of cisatracurium in patients receiving nitrous oxide/opioid/barbiturate anesthesia*. Anesthesiology, 1996. **84**(2): p. 300-8.
21. Ornstein, E., et al., *Pharmacodynamics and pharmacokinetics of cisatracurium in geriatric surgical patients*. Anesthesiology, 1996. **84**(3): p. 520-5.
22. Richard, A., et al., *Cisatracurium-induced neuromuscular blockade is affected by chronic phenytoin or carbamazepine treatment in neurosurgical patients*. Anesth Analg, 2005. **100**(2): p. 538-44.
23. Sorooshian, S.S., et al., *Pharmacokinetics and pharmacodynamics of cisatracurium in young and elderly adult patients*. Anesthesiology, 1996. **84**(5): p. 1083-91.
24. Tran, T.V., P. Fiset, and F. Varin, *Pharmacokinetics and pharmacodynamics of cisatracurium after a short infusion in patients under propofol anesthesia*. Anesth Analg, 1998. **87**(5): p. 1158-63.
25. Schmutz, E., et al., *Evaluation of 51W89 for endotracheal intubation in surgical patients during N 2O/O 2/propofol anesthesia [abstract]*. Anesthesiology, 1994. **81**(3A): p. A1081.
26. Abernethy, D.R., et al., *Probenecid impairment of acetaminophen and lorazepam clearance: direct inhibition of ether glucuronide formation*. J Pharmacol Exp Ther, 1985. **234**(2): p. 345-9.
27. Abernethy, D.R., et al., *Differential effect of cimetidine on drug oxidation (antipyrine and diazepam) vs. conjugation (acetaminophen and lorazepam): prevention of acetaminophen toxicity by cimetidine*. J Pharmacol Exp Ther, 1983. **224**(3): p. 508-13.
28. Liukas, A., et al., *Pharmacokinetics of intravenous paracetamol in elderly patients*. Clin Pharmacokinet, 2011. **50**(2): p. 121-9.
29. Rawlins, M.D., D.B. Henderson, and A.R. Hijab, *Pharmacokinetics of paracetamol (acetaminophen) after intravenous and oral administration*. Eur J Clin Pharmacol, 1977. **11**(4): p. 283-6.
30. Scavone, J.M., G.T. Blyden, and D.J. Greenblatt, *Lack of effect of influenza vaccine on the pharmacokinetics of antipyrine, alprazolam, paracetamol (acetaminophen) and lorazepam*. Clin Pharmacokinet, 1989. **16**(3): p. 180-5.
31. Scavone, J.M., et al., *Acetaminophen pharmacokinetics in women receiving conjugated estrogen*. Eur J Clin Pharmacol, 1990. **38**(1): p. 97-8.
32. Scavone, J.M., et al., *Differential effect of cigarette smoking on antipyrine oxidation versus acetaminophen conjugation*. Pharmacology, 1990. **40**(2): p. 77-84.
33. Sonne, J., et al., *Therapeutic doses of codeine have no effect on acetaminophen clearance or metabolism*. Eur J Clin Pharmacol, 1988. **35**(1): p. 109-11.
34. Blyden, G.T., et al., *Effect of antipyrine coadministration on the kinetics of acetaminophen and lidocaine*. Eur J Clin Pharmacol, 1988. **35**(4): p. 413-7.
35. Gregoire, N., et al., *Safety and pharmacokinetics of paracetamol following intravenous administration of 5 g during the first 24 h with a 2-g starting dose*. Clin Pharmacol Ther, 2007. **81**(3): p. 401-5.
36. Conrad, K.A., et al., *Lidocaine elimination: effects of metoprolol and of propranolol*. Clin Pharmacol Ther, 1983. **33**(2): p. 133-8.

37. De Martin, S., et al., *Differential effect of chronic renal failure on the pharmacokinetics of lidocaine in patients receiving and not receiving hemodialysis*. Clin Pharmacol Ther, 2006. **80**(6): p. 597-606.
38. Isohanni, M.H., et al., *Effect of erythromycin and itraconazole on the pharmacokinetics of intravenous lignocaine*. Eur J Clin Pharmacol, 1998. **54**(7): p. 561-5.
39. Orlando, R., et al., *Cytochrome P450 1A2 is a major determinant of lidocaine metabolism in vivo: effects of liver function*. Clin Pharmacol Ther, 2004. **75**(1): p. 80-8.
40. Robson, R.A., et al., *The effect of ranitidine on the disposition of lignocaine*. Br J Clin Pharmacol, 1985. **20**(2): p. 170-3.
41. Schneck, D.W., et al., *Effects of nadolol and propranolol on plasma lidocaine clearance*. Clin Pharmacol Ther, 1984. **36**(5): p. 584-7.
42. Svendsen, T.L., et al., *Effects of propranolol and pindolol on plasma lignocaine clearance in man*. Br J Clin Pharmacol, 1982. **13**(Suppl 2): p. 223S-226S.
43. Ujhelyi, M.R., et al., *The pharmacokinetic and pharmacodynamic interaction between propafenone and lidocaine*. Clin Pharmacol Ther, 1993. **53**(1): p. 38-48.
44. Orlando, R., et al., *Effect of the CYP3A4 inhibitor erythromycin on the pharmacokinetics of lignocaine and its pharmacologically active metabolites in subjects with normal and impaired liver function*. Br J Clin Pharmacol, 2003. **55**(1): p. 86-93.
45. Olkkola, K.T., et al., *The effect of erythromycin and fluvoxamine on the pharmacokinetics of intravenous lidocaine*. Anesth Analg, 2005. **100**(5): p. 1352-6, table of contents.
46. Reichel, C., et al., *The lignocaine metabolite (MEGX) liver function test and P-450 induction in humans*. Br J Clin Pharmacol, 1998. **46**(6): p. 535-9.
47. Bouillon, T., et al., *Non-steady state analysis of the pharmacokinetic interaction between propofol and remifentanyl*. Anesthesiology, 2002. **97**(6): p. 1350-62.
48. Campbell, G.A., et al., *Extended blood collection period required to define distribution and elimination kinetics of propofol*. Br J Clin Pharmacol, 1988. **26**(2): p. 187-90.
49. Han, T.H., D.J. Greenblatt, and J.A. Martyn, *Propofol clearance and volume of distribution are increased in patients with major burns*. J Clin Pharmacol, 2009. **49**(7): p. 768-72.
50. Hiraoka, H., et al., *Kidneys contribute to the extrahepatic clearance of propofol in humans, but not lungs and brain*. Br J Clin Pharmacol, 2005. **60**(2): p. 176-82.
51. Ickx, B., et al., *Propofol infusion for induction and maintenance of anaesthesia in patients with end-stage renal disease*. Br J Anaesth, 1998. **81**(6): p. 854-60.
52. Knibbe, C.A., et al., *Pharmacokinetics, induction of anaesthesia and safety characteristics of propofol 6% SAZN vs propofol 1% SAZN and Diprivan-10 after bolus injection*. Br J Clin Pharmacol, 1999. **47**(6): p. 653-60.
53. Li, Y.H., et al., *Population pharmacokinetics of propofol in Chinese patients*. Acta Pharmacol Sin, 2003. **24**(6): p. 581-8.
54. Mertens, M.J., et al., *Mixed-effects modeling of the influence of alfentanil on propofol pharmacokinetics*. Anesthesiology, 2004. **100**(4): p. 795-805.
55. Morgan, D.J., G.A. Campbell, and D.P. Crankshaw, *Pharmacokinetics of propofol when given by intravenous infusion*. Br J Clin Pharmacol, 1990. **30**(1): p. 144-8.

56. Takizawa, D., et al., *Plasma concentration for optimal sedation and total body clearance of propofol in patients after esophagectomy*. J Anesth, 2005. **19**(1): p. 88-90.
57. Vuyk, J., et al., *Mixed-effects modeling of the influence of midazolam on propofol pharmacokinetics*. Anesth Analg, 2009. **108**(5): p. 1522-30.
58. Wietasch, J.K., et al., *The performance of a target-controlled infusion of propofol in combination with remifentanyl: a clinical investigation with two propofol formulations*. Anesth Analg, 2006. **102**(2): p. 430-7.
59. Fredricsson, B., et al., *Systemic concentrations of metronidazole and its main metabolites after intravenous oral and vaginal administration*. Gynecol Obstet Invest, 1987. **24**(3): p. 200-7.
60. Jensen, J.C. and R. Gugler, *Single- and multiple-dose metronidazole kinetics*. Clin Pharmacol Ther, 1983. **34**(4): p. 481-7.
61. Lau, A.H., K. Emmons, and R. Seligsohn, *Pharmacokinetics of intravenous metronidazole at different dosages in healthy subjects*. Int J Clin Pharmacol Ther Toxicol, 1991. **29**(10): p. 386-90.
62. Loft, S., et al., *Influence of dose and route of administration on disposition of metronidazole and its major metabolites*. Eur J Clin Pharmacol, 1986. **30**(4): p. 467-73.
63. Loft, S., et al., *Metronidazole elimination is preserved in the elderly*. Hum Exp Toxicol, 1990. **9**(3): p. 155-9.
64. Martin, C., et al., *Pharmacokinetics and tissue penetration of a single 1,000-milligram, intravenous dose of metronidazole for antibiotic prophylaxis of colorectal surgery*. Antimicrob Agents Chemother, 1991. **35**(12): p. 2602-5.
65. Mattila, J., et al., *Comparative pharmacokinetics of metronidazole and tinidazole as influenced by administration route*. Antimicrob Agents Chemother, 1983. **23**(5): p. 721-5.
66. Muscara, M.N., et al., *Plasma hydroxy-metronidazole/metronidazole ratio in patients with liver disease and in healthy volunteers*. Br J Clin Pharmacol, 1995. **40**(5): p. 477-80.
67. Solhaug, J.H., et al., *The pharmacokinetics of one single preoperative dose of metronidazole or tinidazole*. Scand J Gastroenterol Suppl, 1984. **90**: p. 89-96.
68. Soreide, O., et al., *Comparative pharmacokinetics of metronidazole and tinidazole used as single dose prophylactic agents*. Scand J Gastroenterol Suppl, 1984. **90**: p. 97-106.
69. Sprandel, K.A., et al., *Pharmacokinetics and pharmacodynamics of intravenous levofloxacin at 750 milligrams and various doses of metronidazole in healthy adult subjects*. Antimicrob Agents Chemother, 2004. **48**(12): p. 4597-605.
70. Bergan, T., et al., *Pharmacokinetics and bioavailability of metronidazole after tablets, suppositories and intravenous administration*. Scand J Gastroenterol Suppl, 1984. **91**: p. 45-60.
71. Houghton, G.W., et al., *Comparison of the pharmacokinetics of metronidazole in healthy female volunteers following either a single oral or intravenous dose*. Br J Clin Pharmacol, 1979. **8**(4): p. 337-41.
72. Amitai, Y., J. Glustein, and S. Godfrey, *Enhancement of theophylline clearance by oral albuterol*. Chest, 1992. **102**(3): p. 786-9.
73. Bachmann, K., et al., *Failure of ceftibuten to alter single dose theophylline clearance*. J Clin Pharmacol, 1990. **30**(5): p. 444-8.
74. Cremer, K.F., J. Secor, and K.V. Speeg, Jr., *The effect of route of administration on the cimetidine-theophylline drug interaction*. J Clin Pharmacol, 1989. **29**(5): p. 451-6.

75. Davis, R.L., et al., *Effect of norfloxacin on theophylline metabolism*. Antimicrob Agents Chemother, 1989. **33**(2): p. 212-4.
76. Efthimiou, H., et al., *Influence of chronic dosing on theophylline clearance*. Br J Clin Pharmacol, 1984. **17**(5): p. 525-30.
77. Fleetham, J.A., et al., *Dose-dependency of theophylline clearance and protein binding*. Thorax, 1981. **36**(5): p. 382-6.
78. Gisclon, L.G., et al., *Absence of a pharmacokinetic interaction between intravenous theophylline and orally administered levofloxacin*. J Clin Pharmacol, 1997. **37**(8): p. 744-50.
79. Jonkman, J.H., et al., *Effects of alpha-interferon on theophylline pharmacokinetics and metabolism*. Br J Clin Pharmacol, 1989. **27**(6): p. 795-802.
80. Jonkman, J.H., et al., *The influence of caffeine on the steady-state pharmacokinetics of theophylline*. Clin Pharmacol Ther, 1991. **49**(3): p. 248-55.
81. Knoppert, D.C., et al., *Cystic fibrosis: enhanced theophylline metabolism may be linked to the disease*. Clin Pharmacol Ther, 1988. **44**(3): p. 254-64.
82. Ko, J.W., et al., *Theophylline pharmacokinetics are not altered by lansoprazole in CYP2C19 poor metabolizers*. Clin Pharmacol Ther, 1999. **65**(6): p. 606-14.
83. Korrapati, M.R., R.E. Vestal, and C.M. Loi, *Theophylline metabolism in healthy nonsmokers and in patients with insulin-dependent diabetes mellitus*. Clin Pharmacol Ther, 1995. **57**(4): p. 413-8.
84. Lacarelle, B., et al., *The quinolone, flumequine, has no effect on theophylline pharmacokinetics*. Eur J Clin Pharmacol, 1994. **46**(5): p. 477-8.
85. Lin, J.H., et al., *Comparative effect of famotidine and cimetidine on the pharmacokinetics of theophylline in normal volunteers*. Br J Clin Pharmacol, 1987. **24**(5): p. 669-72.
86. Mucklow, J.C. and S. Kuhn, *The rise and fall of serum theophylline concentration: a comparison of sustained-release formulations in volunteers with rapid theophylline clearance*. Br J Clin Pharmacol, 1985. **20**(6): p. 589-96.
87. Oosterhuis, B., et al., *No influence of single intravenous doses of omeprazole on theophylline elimination kinetics*. J Clin Pharmacol, 1992. **32**(5): p. 470-5.
88. Rodgers, A., K.W. Woodhouse, and D.N. Bateman, *Effects of time of dosing and age on intravenous aminophylline pharmacokinetics*. Br J Clin Pharmacol, 1987. **23**(3): p. 344-7.
89. Secor, J.W., et al., *Lack of effect of nizatidine on hepatic drug metabolism in man*. Br J Clin Pharmacol, 1985. **20**(6): p. 710-3.
90. Stringer, K.A., et al., *The effect of three different oral doses of verapamil on the disposition of theophylline*. Eur J Clin Pharmacol, 1992. **43**(1): p. 35-8.
91. Wijnands, G.J., et al., *The effect of multiple-dose oral lomefloxacin on theophylline metabolism in man*. Chest, 1990. **98**(6): p. 1440-4.
92. Barriere, S.L., et al., *Alteration in the pharmacokinetic disposition of ciprofloxacin by simultaneous administration of azlocillin*. Antimicrob Agents Chemother, 1990. **34**(5): p. 823-6.
93. Brunner, M., et al., *Target site concentrations of ciprofloxacin after single intravenous and oral doses*. Antimicrob Agents Chemother, 2002. **46**(12): p. 3724-30.
94. Drusano, G.L., et al., *Dose ranging study and constant infusion evaluation of ciprofloxacin*. Antimicrob Agents Chemother, 1986. **30**(3): p. 440-3.
95. Drusano, G.L., et al., *Pharmacokinetics of intravenously administered ciprofloxacin in patients with various degrees of renal function*. Antimicrob Agents Chemother, 1987. **31**(6): p. 860-4.



96. Dudley, M.N., J. Ericson, and S.H. Zinner, *Effect of dose on serum pharmacokinetics of intravenous ciprofloxacin with identification and characterization of extravascular compartments using noncompartmental and compartmental pharmacokinetic models*. Antimicrob Agents Chemother, 1987. **31**(11): p. 1782-6.
97. Dudley, M.N., et al., *Pharmacokinetics and pharmacodynamics of intravenous ciprofloxacin. Studies in vivo and in an in vitro dynamic model*. Am J Med, 1987. **82**(4A): p. 363-8.
98. Garrelts, J.C., et al., *Ciprofloxacin pharmacokinetics in burn patients*. Antimicrob Agents Chemother, 1996. **40**(5): p. 1153-6.
99. Gonzalez, M.A., et al., *Multiple-dose ciprofloxacin dose ranging and kinetics*. Clin Pharmacol Ther, 1985. **37**(6): p. 633-7.
100. Gonzalez, M.A., et al., *Multiple-dose pharmacokinetics of ciprofloxacin administered intravenously to normal volunteers*. Antimicrob Agents Chemother, 1985. **28**(2): p. 235-9.
101. Hirata, C.A., et al., *Steady-state pharmacokinetics of intravenous and oral ciprofloxacin in elderly patients*. Antimicrob Agents Chemother, 1989. **33**(11): p. 1927-31.
102. Hoffken, G., et al., *Pharmacokinetics of ciprofloxacin after oral and parenteral administration*. Antimicrob Agents Chemother, 1985. **27**(3): p. 375-9.
103. Jaehde, U., et al., *Effect of probenecid on the distribution and elimination of ciprofloxacin in humans*. Clin Pharmacol Ther, 1995. **58**(5): p. 532-41.
104. Lettieri, J.T., et al., *Pharmacokinetic profiles of ciprofloxacin after single intravenous and oral doses*. Antimicrob Agents Chemother, 1992. **36**(5): p. 993-6.
105. Lipman, J., et al., *Pharmacokinetic profiles of high-dose intravenous ciprofloxacin in severe sepsis. The Baragwanath Ciprofloxacin Study Group*. Antimicrob Agents Chemother, 1998. **42**(9): p. 2235-9.
106. Plaisance, K.I., et al., *Effect of renal function on the bioavailability of ciprofloxacin*. Antimicrob Agents Chemother, 1990. **34**(6): p. 1031-4.
107. Rohwedder, R., et al., *Transintestinal elimination of ciprofloxacin*. Chemotherapy, 1990. **36**(2): p. 77-84.
108. Shah, A., et al., *Pharmacokinetics of high-dose intravenous ciprofloxacin in young and elderly and in male and female subjects*. Antimicrob Agents Chemother, 1995. **39**(4): p. 1003-6.
109. Wise, R., et al., *Pharmacokinetics of intravenously administered ciprofloxacin*. Antimicrob Agents Chemother, 1984. **26**(2): p. 208-10.
110. Allonen, H., G. Ziegler, and U. Klotz, *Midazolam kinetics*. Clin Pharmacol Ther, 1981. **30**(5): p. 653-61.
111. Bell, D.M., et al., *A comparative pharmacokinetic study of intravenous and intramuscular midazolam in patients with epilepsy*. Epilepsy Res, 1991. **10**(2-3): p. 183-90.
112. Belle, D.J., et al., *The effects of an oral contraceptive containing ethinylloestradiol and norgestrel on CYP3A activity*. Br J Clin Pharmacol, 2002. **53**(1): p. 67-74.
113. Chen, M., et al., *Sex differences in CYP3A activity using intravenous and oral midazolam*. Clin Pharmacol Ther, 2006. **80**(5): p. 531-8.
114. Chen, Y.C., et al., *Poor correlation between 6beta-hydroxycortisol:cortisol molar ratios and midazolam clearance as measure of hepatic CYP3A activity*. Br J Clin Pharmacol, 2006. **62**(2): p. 187-95.
115. Darwish, M., et al., *Interaction profile of armodafinil with medications metabolized by cytochrome P450 enzymes 1A2, 3A4 and 2C19 in healthy subjects*. Clin Pharmacokinet, 2008. **47**(1): p. 61-74.

116. Farkas, D., et al., *Pomegranate juice does not impair clearance of oral or intravenous midazolam, a probe for cytochrome P450-3A activity: comparison with grapefruit juice*. J Clin Pharmacol, 2007. **47**(3): p. 286-94.
117. Greenblatt, D.J., et al., *Automated gas chromatography for studies of midazolam pharmacokinetics*. Anesthesiology, 1981. **55**(2): p. 176-9.
118. Greenblatt, D.J., et al., *Pharmacokinetic and electroencephalographic study of intravenous diazepam, midazolam, and placebo*. Clin Pharmacol Ther, 1989. **45**(4): p. 356-65.
119. Greenblatt, D.J., et al., *Effect of age, gender, and obesity on midazolam kinetics*. Anesthesiology, 1984. **61**(1): p. 27-35.
120. Heizmann, P., M. Eckert, and W.H. Ziegler, *Pharmacokinetics and bioavailability of midazolam in man*. Br J Clin Pharmacol, 1983. **16 Suppl 1**: p. 43S-49S.
121. Ibrahim, A., et al., *The influence of parecoxib, a parenteral cyclooxygenase-2 specific inhibitor, on the pharmacokinetics and clinical effects of midazolam*. Anesth Analg, 2002. **95**(3): p. 667-73, table of contents.
122. Kharasch, E.D., et al., *Intraindividual variability in male hepatic CYP3A4 activity assessed by alfentanil and midazolam clearance*. J Clin Pharmacol, 1999. **39**(7): p. 664-9.
123. Kharasch, E.D., et al., *The role of cytochrome P450 3A4 in alfentanil clearance. Implications for interindividual variability in disposition and perioperative drug interactions*. Anesthesiology, 1997. **87**(1): p. 36-50.
124. Klotz, U. and G. Ziegler, *Physiologic and temporal variation in hepatic elimination of midazolam*. Clin Pharmacol Ther, 1982. **32**(1): p. 107-12.
125. Knoester, P.D., et al., *Pharmacokinetics and pharmacodynamics of midazolam administered as a concentrated intranasal spray. A study in healthy volunteers*. Br J Clin Pharmacol, 2002. **53**(5): p. 501-7.
126. Kupferschmidt, H.H., et al., *Interaction between grapefruit juice and midazolam in humans*. Clin Pharmacol Ther, 1995. **58**(1): p. 20-8.
127. Lappin, G., et al., *Use of microdosing to predict pharmacokinetics at the therapeutic dose: experience with 5 drugs*. Clin Pharmacol Ther, 2006. **80**(3): p. 203-15.
128. Majumdar, A.K., et al., *Effect of aprepitant on the pharmacokinetics of intravenous midazolam*. J Clin Pharmacol, 2007. **47**(6): p. 744-50.
129. Mandema, J.W., et al., *Pharmacokinetic-pharmacodynamic modeling of the central nervous system effects of midazolam and its main metabolite alpha-hydroxymidazolam in healthy volunteers*. Clin Pharmacol Ther, 1992. **51**(6): p. 715-28.
130. Masica, A.L., G. Mayo, and G.R. Wilkinson, *In vivo comparisons of constitutive cytochrome P450 3A activity assessed by alprazolam, triazolam, and midazolam*. Clin Pharmacol Ther, 2004. **76**(4): p. 341-9.
131. Ochs, H.R., D.J. Greenblatt, and M. Knuchel, *Kinetics of diazepam, midazolam, and lorazepam in cigarette smokers*. Chest, 1985. **87**(2): p. 223-6.
132. Olkkola, K.T., et al., *A potentially hazardous interaction between erythromycin and midazolam*. Clin Pharmacol Ther, 1993. **53**(3): p. 298-305.
133. Pecking, M., et al., *Absolute bioavailability of midazolam after subcutaneous administration to healthy volunteers*. Br J Clin Pharmacol, 2002. **54**(4): p. 357-62.
134. Platten, H.P., et al., *Pharmacokinetics and the pharmacodynamic action of midazolam in young and elderly patients undergoing tooth extraction*. Clin Pharmacol Ther, 1998. **63**(5): p. 552-60.
135. Saari, T.I., et al., *Effect of voriconazole on the pharmacokinetics and pharmacodynamics of intravenous and oral midazolam*. Clin Pharmacol Ther, 2006. **79**(4): p. 362-70.

136. Smith, M.T., M.J. Eadie, and T.O. Brophy, *The pharmacokinetics of midazolam in man*. Eur J Clin Pharmacol, 1981. **19**(4): p. 271-8.
137. Tateishi, T., et al., *CYP3A activity in European American and Japanese men using midazolam as an in vivo probe*. Clin Pharmacol Ther, 2001. **69**(5): p. 333-9.
138. Thummel, K.E., et al., *Oral first-pass elimination of midazolam involves both gastrointestinal and hepatic CYP3A-mediated metabolism*. Clin Pharmacol Ther, 1996. **59**(5): p. 491-502.
139. Wandel, C., et al., *CYP3A activity in African American and European American men: population differences and functional effect of the CYP3A4\*1B5'-promoter region polymorphism*. Clin Pharmacol Ther, 2000. **68**(1): p. 82-91.
140. Chalasani, N., et al., *Hepatic and intestinal cytochrome P450 3A activity in cirrhosis: effects of transjugular intrahepatic portosystemic shunts*. Hepatology, 2001. **34**(6): p. 1103-8.
141. Tham, L.S., et al., *Ketoconazole renders poor CYP3A phenotype status with midazolam as probe drug*. Ther Drug Monit, 2006. **28**(2): p. 255-61.
142. Tomalik-Scharte, D., et al., *Plasma 4beta-hydroxycholesterol: an endogenous CYP3A metric?* Clin Pharmacol Ther, 2009. **86**(2): p. 147-53.
143. Abernethy, D.R., et al., *Ranitidine does not impair oxidative or conjugative metabolism: noninteraction with antipyrine, diazepam, and lorazepam*. Clin Pharmacol Ther, 1984. **35**(2): p. 188-92.
144. Kearns, G.L., et al., *Hepatic drug clearance in patients with mild cystic fibrosis*. Clin Pharmacol Ther, 1996. **59**(5): p. 529-40.
145. Scavone, J.M., et al., *Simplified approaches to the determination of antipyrine pharmacokinetic parameters*. Br J Clin Pharmacol, 1988. **25**(6): p. 695-9.
146. St Peter, J.V., et al., *The Effects of Lansoprazole on the Disposition of Antipyrine and Indocyanine Green in Normal Human Subjects*. Am J Ther, 1995. **2**(8): p. 561-568.
147. Thompson, G.A., et al., *Assessment of doxylamine influence on mixed function oxidase activity upon multiple dose oral administration to normal volunteers*. J Pharm Sci, 1996. **85**(11): p. 1242-7.
148. Maddocks, J.L., C.J. Wake, and M.J. Harber, *The plasma half-life of antipyrine in chronic uraemic and normal subjects*. Br J Clin Pharmacol, 1975. **2**(4): p. 339-43.
149. Cheng, J.W., et al., *Is the volume of distribution of digoxin reduced in patients with renal dysfunction? Determining digoxin pharmacokinetics by fluorescence polarization immunoassay*. Pharmacotherapy, 1997. **17**(3): p. 584-90.
150. Ding, R., et al., *Substantial pharmacokinetic interaction between digoxin and ritonavir in healthy volunteers*. Clin Pharmacol Ther, 2004. **76**(1): p. 73-84.
151. Drescher, S., et al., *P-glycoprotein-mediated intestinal and biliary digoxin transport in humans*. Clin Pharmacol Ther, 2003. **73**(3): p. 223-31.
152. Greiner, B., et al., *The role of intestinal P-glycoprotein in the interaction of digoxin and rifampin*. J Clin Invest, 1999. **104**(2): p. 147-53.
153. Hinderling, P.H. and D. Hartmann, *Pharmacokinetics of digoxin and main metabolites/derivatives in healthy humans*. Ther Drug Monit, 1991. **13**(5): p. 381-401.
154. Johnson, B.F., et al., *The comparative effects of verapamil and a new dihydropyridine calcium channel blocker on digoxin pharmacokinetics*. Clin Pharmacol Ther, 1987. **42**(1): p. 66-71.

155. Koup, J.R., et al., *Pharmacokinetics of digoxin in normal subjects after intravenous bolus and infusion doses*. J Pharmacokinet Biopharm, 1975. **3**(3): p. 181-92.
156. Lalonde, R.L., et al., *Acceleration of digoxin clearance by activated charcoal*. Clin Pharmacol Ther, 1985. **37**(4): p. 367-71.
157. Lloyd, B.L., et al., *Pharmacokinetics and bioavailability of digoxin capsules, solution and tablets after single and multiple doses*. Am J Cardiol, 1978. **42**(1): p. 129-36.
158. Miyazawa, Y., et al., *Effects of the concomitant administration of tamsulosin (0.8 mg/day) on the pharmacokinetic and safety profile of theophylline (5 mg/kg): a placebo-controlled evaluation*. J Int Med Res, 2002. **30**(1): p. 34-43.
159. Ochs, H.R., et al., *Dose-independent pharmacokinetics of digoxin in humans*. Am Heart J, 1978. **96**(4): p. 507-11.
160. Ochs, H.R., et al., *Pharmacokinetics and pharmacodynamics of intravenous digoxin and digitoxin*. Klin Wochenschr, 1981. **59**(16): p. 889-97.
161. O'Riordan, S., et al., *Serum cystatin C is not a better marker of creatinine or digoxin clearance than serum creatinine*. Br J Clin Pharmacol, 2002. **53**(4): p. 398-402.
162. Park, G.D., et al., *The effects of activated charcoal on digoxin and digitoxin clearance*. Drug Intell Clin Pharm, 1985. **19**(12): p. 937-41.
163. Wagner, J.G., et al., *Evidence of nonlinearity in digoxin pharmacokinetics*. J Pharmacokinet Biopharm, 1981. **9**(2): p. 147-66.
164. Wandell, M., et al., *Effect of quinine on digoxin kinetics*. Clin Pharmacol Ther, 1980. **28**(4): p. 425-30.
165. Ochs, H.R., D.J. Greenblatt, and G. Bodem, *Single- and multiple-dose kinetics of intravenous digoxin*. Clin Pharmacol Ther, 1980. **28**(3): p. 340-5.
166. Andreasen, F., H.E. Hansen, and E. Mikkelsen, *Pharmacokinetics of furosemide in anephric patients and in normal subjects*. Eur J Clin Pharmacol, 1978. **13**(1): p. 41-8.
167. Beermann, B., E. Dalen, and B. Lindstrom, *Elimination of furosemide in healthy subjects and in those with renal failure*. Clin Pharmacol Ther, 1977. **22**(1): p. 70-8.
168. Branch, R.A., et al., *Determinants of response to frusemide in normal subjects*. Br J Clin Pharmacol, 1977. **4**(2): p. 121-7.
169. Cutler, R.E., et al., *Pharmacokinetics of furosemide in normal subjects and functionally anephric patients*. Clin Pharmacol Ther, 1974. **15**(6): p. 588-96.
170. Haegeli, L., et al., *Sublingual administration of furosemide: new application of an old drug*. Br J Clin Pharmacol, 2007. **64**(6): p. 804-9.
171. Homeida, M., C. Roberts, and R.A. Branch, *Influence of probenecid and spironolactone on furosemide kinetics and dynamics in man*. Clin Pharmacol Ther, 1977. **22**(4): p. 402-9.
172. Honari, J., A.D. Blair, and R.E. Cutler, *Effects of probenecid on furosemide kinetics and natriuresis in man*. Clin Pharmacol Ther, 1977. **22**(4): p. 395-401.
173. Kelly, M.R., et al., *Pharmacokinetics of orally administered furosemide*. Clin Pharmacol Ther, 1974. **15**(2): p. 178-86.
174. Rane, A., et al., *Plasma binding and disposition of furosemide in the nephrotic syndrome and in uremia*. Clin Pharmacol Ther, 1978. **24**(2): p. 199-207.
175. Rosenkranz, B., et al., *Metamizole-furosemide interaction study in healthy volunteers*. Eur J Clin Pharmacol, 1992. **42**(6): p. 593-8.
176. Smith, D.E., et al., *Attenuation of furosemide's diuretic effect by indomethacin: pharmacokinetic evaluation*. J Pharmacokinet Biopharm, 1979. **7**(3): p. 265-74.

177. Smith, D.E., E.T. Lin, and L.Z. Benet, *Absorption and disposition of furosemide in healthy volunteers, measured with a metabolite-specific assay*. Drug Metab Dispos, 1980. **8**(5): p. 337-42.
178. Tilstone, W.J. and A. Fine, *Furosemide kinetics in renal failure*. Clin Pharmacol Ther, 1978. **23**(6): p. 644-50.
179. Zhu, J.B. and T. Koizumi, *A study on furosemide disposition in man*. J Pharmacobiodyn, 1987. **10**(8): p. 370-6.
180. Rupp and Hajdu, *Pharmacokinetics and pharmacodynamics of a diuretic agent*. , in *Symposium on Pharmacological and Clinical Significance of Pharmacokinetics*, H.J. Dengler, Editor. 1970, Schattauer, Verlag, Stuttgart. p. pp. 105-111.
181. Andreasen, F. and E. Mikkelsen, *Distribution, elimination and effect of furosemide in normal subjects and in patients with heart failure*. Eur J Clin Pharmacol, 1977. **12**(1): p. 15-22.
182. Hammarlund, M.M., L.K. Paalzow, and B. Odland, *Pharmacokinetics of furosemide in man after intravenous and oral administration. Application of moment analysis*. Eur J Clin Pharmacol, 1984. **26**(2): p. 197-207.
183. Keller, E., et al., *Influence of hepatic cirrhosis and end-stage renal disease on pharmacokinetics and pharmacodynamics of furosemide*. Eur J Clin Pharmacol, 1981. **20**(1): p. 27-33.
184. Martin, U., R.J. Winney, and L.F. Prescott, *Furosemide disposition in patients on CAPD*. Eur J Clin Pharmacol, 1995. **48**(5): p. 385-90.
185. Schmitt, J.K., et al., *Inhibition by indomethacin of the glycemic response to arginine in man*. Proc Soc Exp Biol Med, 1980. **163**(2): p. 237-9.
186. Homer, T.D. and D.R. Stanski, *The effect of increasing age on thiopental disposition and anesthetic requirement*. Anesthesiology, 1985. **62**(6): p. 714-24.
187. Hudson, R.J., D.R. Stanski, and P.G. Burch, *Pharmacokinetics of methohexital and thiopental in surgical patients*. Anesthesiology, 1983. **59**(3): p. 215-9.
188. Burch, P.G. and D.R. Stanski, *Decreased protein binding and thiopental kinetics*. Clin Pharmacol Ther, 1982. **32**(2): p. 212-7.
189. Burch, P.G. and D.R. Stanski, *The role of metabolism and protein binding in thiopental anesthesia*. Anesthesiology, 1983. **58**(2): p. 146-52.
190. Christensen, J.H., F. Andreasen, and J.A. Jansen, *Pharmacokinetics of thiopentone in a group of young women and a group of young men*. Br J Anaesth, 1980. **52**(9): p. 913-8.
191. Christensen, J.H., F. Andreasen, and J.A. Jansen, *Influence of age and sex on the pharmacokinetics of thiopentone*. Br J Anaesth, 1981. **53**(11): p. 1189-95.
192. Christensen, J.H., F. Andreasen, and J.A. Jansen, *Pharmacokinetics and pharmacodynamics of thiopentone, A comparison between young and elderly patients*. Anaesthesia, 1982. **37**(4): p. 398-404.
193. Christensen, J.H., F. Andreasen, and J.A. Jansen, *Thiopentone sensitivity in young and elderly women*. Br J Anaesth, 1983. **55**(1): p. 33-40.
194. Christensen, J.H., F. Andreasen, and M.B. Kristoffersen, *Comparison of the anaesthetic and haemodynamic effects of chlormethiazole and thiopentone*. Br J Anaesth, 1983. **55**(5): p. 391-7.
195. Couderc, E., et al., *Thiopentone pharmacokinetics in patients with chronic alcoholism*. Br J Anaesth, 1984. **56**(12): p. 1393-7.
196. Crankshaw, D.P., A. Rosler, and M. Ware, *The short term distribution of thiopentone in the dog*. Anaesth Intensive Care, 1979. **7**(2): p. 148-51.
197. Ghoneim, M.M. and M.J. Van Hamme, *Pharmacokinetics of thiopentone: effects of enflurane and nitrous oxide anaesthesia and surgery*. Br J Anaesth, 1978. **50**(12): p. 1237-42.

198. Jung, D., et al., *Thiopental disposition in lean and obese patients undergoing surgery*. *Anesthesiology*, 1982. **56**(4): p. 269-74.
199. Morgan, D.J., et al., *Pharmacokinetics and plasma binding of thiopental. II: Studies at cesarean section*. *Anesthesiology*, 1981. **54**(6): p. 474-80.
200. Morgan, D.J., et al., *Pharmacokinetics and plasma binding of thiopental. I: Studies in surgical patients*. *Anesthesiology*, 1981. **54**(6): p. 468-73.
201. Pandelet, G., et al., *Thiopental pharmacokinetics in patients with cirrhosis*. *Anesthesiology*, 1983. **59**(2): p. 123-6.
202. Swerdlow, B.N., et al., *Chronic alcohol intake does not change thiopental anesthetic requirement, pharmacokinetics, or pharmacodynamics*. *Anesthesiology*, 1990. **72**(3): p. 455-61.
203. Chung, J.Y., et al., *Effect of the UGT2B15 genotype on the pharmacokinetics, pharmacodynamics, and drug interactions of intravenous lorazepam in healthy volunteers*. *Clin Pharmacol Ther*, 2005. **77**(6): p. 486-94.
204. Crom, W.R., et al., *Age-related differences in hepatic drug clearance in children: studies with lorazepam and antipyrine*. *Clin Pharmacol Ther*, 1991. **50**(2): p. 132-40.
205. Greenblatt, D.J., et al., *Kinetic and dynamic study of intravenous lorazepam: comparison with intravenous diazepam*. *J Pharmacol Exp Ther*, 1989. **250**(1): p. 134-40.
206. Ochs, H.R., D.J. Greenblatt, and B. Verburg-Ochs, *Propranolol interactions with diazepam, lorazepam, and alprazolam*. *Clin Pharmacol Ther*, 1984. **36**(4): p. 451-5.
207. Relling, M.V., et al., *Lorazepam pharmacodynamics and pharmacokinetics in children*. *J Pediatr*, 1989. **114**(4 Pt 1): p. 641-6.
208. Segal, J.L., et al., *Decreased systemic clearance of lorazepam in humans with spinal cord injury*. *J Clin Pharmacol*, 1991. **31**(7): p. 651-6.
209. Wermeling, D.P., et al., *Bioavailability and pharmacokinetics of lorazepam after intranasal, intravenous, and intramuscular administration*. *J Clin Pharmacol*, 2001. **41**(11): p. 1225-31.
210. Chung, J.Y., et al., *Pharmacokinetic and pharmacodynamic interaction of lorazepam and valproic acid in relation to UGT2B7 genetic polymorphism in healthy subjects*. *Clin Pharmacol Ther*, 2008. **83**(4): p. 595-600.
211. Abernethy, D.R., et al., *Interaction of propoxyphene with diazepam, alprazolam and lorazepam*. *Br J Clin Pharmacol*, 1985. **19**(1): p. 51-7.
212. Blyden, G.T., J.M. Scavone, and D.J. Greenblatt, *Metronidazole impairs clearance of phenytoin but not of alprazolam or lorazepam*. *J Clin Pharmacol*, 1988. **28**(3): p. 240-5.
213. Greenblatt, D.J., et al., *Pharmacokinetics and bioavailability of intravenous, intramuscular, and oral lorazepam in humans*. *J Pharm Sci*, 1979. **68**(1): p. 57-63.
214. Kraus, J.W., et al., *Effects of aging and liver disease on disposition of lorazepam*. *Clin Pharmacol Ther*, 1978. **24**(4): p. 411-9.
215. Abernethy, D.R., et al., *Lorazepam and oxazepam kinetics in women on low-dose oral contraceptives*. *Clin Pharmacol Ther*, 1983. **33**(5): p. 628-32.
216. Chaudhary, A., et al., *Multiple-dose lorazepam kinetics: shuttling of lorazepam glucuronide between the circulation and the gut during day- and night-time dosing intervals in response to feeding*. *J Pharmacol Exp Ther*, 1993. **267**(3): p. 1034-8.
217. Greenblatt, D.J., et al., *Pharmacokinetic comparison of sublingual lorazepam with intravenous, intramuscular, and oral lorazepam*. *J Pharm Sci*, 1982. **71**(2): p. 248-52.
218. Nielsen-Kudsk, F., et al., *Pharmacokinetics and bioavailability of intravenous and intramuscular lorazepam with an adjunct test of the inattention effect in humans*. *Acta Pharmacol Toxicol (Copenh)*, 1983. **52**(2): p. 121-7.

219. Andersson, T., et al., *Effect of omeprazole treatment on diazepam plasma levels in slow versus normal rapid metabolizers of omeprazole*. Clin Pharmacol Ther, 1990. **47**(1): p. 79-85.
220. Dhillon, S. and A. Richens, *Pharmacokinetics of diazepam in epileptic patients and normal volunteers following intravenous administration*. Br J Clin Pharmacol, 1981. **12**(6): p. 841-4.
221. Greenblatt, D.J., et al., *Diazepam disposition determinants*. Clin Pharmacol Ther, 1980. **27**(3): p. 301-12.
222. Greenblatt, D.J., et al., *Desmethyldiazepam pharmacokinetics: studies following intravenous and oral desmethyldiazepam, oral clorazepate, and intravenous diazepam*. J Clin Pharmacol, 1988. **28**(9): p. 853-9.
223. Gugler, R., et al., *Lack of pharmacokinetic interaction of pantoprazole with diazepam in man*. Br J Clin Pharmacol, 1996. **42**(2): p. 249-52.
224. Herman, R.J. and G.R. Wilkinson, *Disposition of diazepam in young and elderly subjects after acute and chronic dosing*. Br J Clin Pharmacol, 1996. **42**(2): p. 147-55.
225. Jensen, J.C. and R. Gugler, *Interaction between metronidazole and drugs eliminated by oxidative metabolism*. Clin Pharmacol Ther, 1985. **37**(4): p. 407-10.
226. Kamali, F., S.H. Thomas, and C. Edwards, *The influence of steady-state ciprofloxacin on the pharmacokinetics and pharmacodynamics of a single dose of diazepam in healthy volunteers*. Eur J Clin Pharmacol, 1993. **44**(4): p. 365-7.
227. Klotz, U., K.H. Antonin, and P.R. Bieck, *Pharmacokinetics and plasma binding of diazepam in man, dog, rabbit, guinea pig and rat*. J Pharmacol Exp Ther, 1976. **199**(1): p. 67-73.
228. Klotz, U., et al., *The effects of age and liver disease on the disposition and elimination of diazepam in adult man*. J Clin Invest, 1975. **55**(2): p. 347-59.
229. Lefebvre, R.A., et al., *Influence of lansoprazole treatment on diazepam plasma concentrations*. Clin Pharmacol Ther, 1992. **52**(5): p. 458-63.
230. Locniskar, A., et al., *Interaction of diazepam with famotidine and cimetidine, two H<sub>2</sub>-receptor antagonists*. J Clin Pharmacol, 1986. **26**(4): p. 299-303.
231. Ochs, H.R., et al., *Diazepam kinetics in relation to age and sex*. Pharmacology, 1981. **23**(1): p. 24-30.
232. Wijnands, W.J., et al., *Ciprofloxacin does not impair the elimination of diazepam in humans*. Drug Metab Dispos, 1990. **18**(6): p. 954-7.
233. Egan, T.D., et al., *Remifentanyl versus alfentanil: comparative pharmacokinetics and pharmacodynamics in healthy adult male volunteers*. Anesthesiology, 1996. **84**(4): p. 821-33.
234. Ibrahim, A.E., et al., *Simultaneous assessment of drug interactions with low- and high-extraction opioids: application to parecoxib effects on the pharmacokinetics and pharmacodynamics of fentanyl and alfentanil*. Anesthesiology, 2003. **98**(4): p. 853-61.
235. Kharasch, E.D., et al., *Mechanism of ritonavir changes in methadone pharmacokinetics and pharmacodynamics: II. Ritonavir effects on CYP3A and P-glycoprotein activities*. Clin Pharmacol Ther, 2008. **84**(4): p. 506-12.
236. Mertens, M.J., et al., *Propofol alters the pharmacokinetics of alfentanil in healthy male volunteers*. Anesthesiology, 2001. **94**(6): p. 949-57.
237. Palkama, V.J., et al., *The effect of intravenous and oral fluconazole on the pharmacokinetics and pharmacodynamics of intravenous alfentanil*. Anesth Analg, 1998. **87**(1): p. 190-4.
238. Petros, A., et al., *The pharmacokinetics of alfentanil after normothermic and hypothermic cardiopulmonary bypass*. Anesth Analg, 1995. **81**(3): p. 458-64.

239. Phimmasone, S. and E.D. Kharasch, *A pilot evaluation of alfentanil-induced miosis as a noninvasive probe for hepatic cytochrome P450 3A4 (CYP3A4) activity in humans*. Clin Pharmacol Ther, 2001. **70**(6): p. 505-17.
240. Raucoules-Aime, M., et al., *Hepatic disposition of alfentanil and sufentanil in patients undergoing orthotopic liver transplantation*. Anesth Analg, 1997. **84**(5): p. 1019-24.
241. Saari, T.I., et al., *Voriconazole, but not terbinafine, markedly reduces alfentanil clearance and prolongs its half-life*. Clin Pharmacol Ther, 2006. **80**(5): p. 502-8.
242. Sitar, D.S., et al., *Aging and alfentanil disposition in healthy volunteers and surgical patients*. Can J Anaesth, 1989. **36**(2): p. 149-54.
243. McDonnell, C.G., et al., *Elimination of alfentanil delivered by infusion is not altered by the chronic administration of atorvastatin*. Eur J Anaesthesiol, 2003. **20**(8): p. 662-7.
